# Supplementary material for: A synthesized sphalerite standard for in situ analysis of sulfur isotopes and trace elements by LA-MC-ICP-MS and LA-ICP-MS
Source: Royal Society of Chemistry journal article supplement (doi:10.1039/d4ja00151f), 2024-01-01
Supplement: d4ja00151f2.pdf [file d4ja00151f2.pdf]

## Supporting Information

# A synthesized sphalerite standard for in situ analysis of sulfur isotopes and trace elements by LA-MC-ICP-MS and LA-ICP-MS

Zhi-hui Dai<sup>a</sup>, Peng Liao<sup>b</sup>, Dengjun Wang<sup>c</sup>, Sen Lin<sup>d\*</sup>, He-ping Li<sup>d</sup>, Zhi-an Bao<sup>e</sup>, Ke-jun Hou<sup>f</sup>, Lie-meng Chen<sup>a</sup>, Ting-guang Lan<sup>a</sup> and Can Cui<sup>g</sup>

<sup>a</sup>State Key Laboratory of Ore Deposit Geochemistry, Institute of Geochemistry, Chinese Academy of Sciences, Guiyang 550081, China

<sup>b</sup>State Key Laboratory of Environmental Geochemistry, Institute of Geochemistry, Chinese Academy of Sciences, Guiyang 550081, China

<sup>c</sup>School of Fisheries, Aquaculture and Aquatic Sciences, Auburn University, Auburn, AL 36849, USA

<sup>d</sup>Key Laboratory for High Temperature & High Pressure Study of the Earth's Interior, Institute of Geochemistry, Chinese Academy of Sciences, Guiyang, 550081, China

<sup>e</sup>State Key Laboratory of Continental Dynamics, Department of Geology, Northwest University, Xi'an 710069, China

<sup>f</sup>Institute of Mineral Resources, Chinese Academy of Geological Sciences, Beijing 100037, China

<sup>g</sup>School of Chemical Engineering, Guizhou Minzu University, Guiyang 550025, China

\* Corresponding author, email address: [linsen@mail.gyig.ac.cn](mailto:linsen@mail.gyig.ac.cn)

**Supplementary Table 1.** The published reference materials applied in microanalysis of sphalerite for LA-MC-ICP-MS and LA-ICP-MS.

|              | Name        | Material                   | $\delta^{34}\text{S}_{\text{V-CDT}} (\text{‰})$ | Ref.                              |
|--------------|-------------|----------------------------|-------------------------------------------------|-----------------------------------|
| LA-MC-ICP-MS | NBS123      | Natural sphalerite         | +17.75±0.17‰                                    | Pribil et al. <sup>59</sup>       |
|              | PSPT-3      | Pressed powder tablet      | +26.4±0.21‰                                     | Bao et al. <sup>23</sup>          |
|              | SPH-1       | Natural sphalerite         | -7.13±0.41‰                                     | Lv et al. <sup>51</sup>           |
|              | PAS-GBW0270 | PAS-synthesized sphalerite | -5.44±0.2‰                                      | Nie et al. <sup>31</sup>          |
|              | Name        | Material                   | Matrix                                          | Ref.                              |
| LA-ICP-MS    | MASS-1      | Pressed powder tablet      | Fe-Zn-Cu-S                                      | Wilson et al. <sup>22</sup>       |
|              | MUL-ZnS-1   | Sintering pressed pellet   | Fe-Zn-S                                         | Onuk et al. <sup>1</sup>          |
|              | STDGL2b2    | Li-borate fused glass      | Fe-Zn-Se-S                                      | Danyushevsky et al. <sup>19</sup> |
|              | STDGL3      | Li-borate fused glass      | Fe-Zn-S                                         | Belousov et al. <sup>30</sup>     |

**Supplementary Table 2** Concentrations of different elements in quality control material (GBW07270) analyzed by ICP-MS ( $\mu\text{g g}^{-1}$ )

|    | Preferred value | Calibration values |             |             |         |
|----|-----------------|--------------------|-------------|-------------|---------|
|    |                 | Duplicate 1        | Duplicate 2 | Duplicate 3 | RSD (%) |
| Ag | 5               | 4.97               | 5.11        | 5.07        | 1.43    |
| As | 3.3             | 3.01               | 2.99        | 2.97        | 0.67    |
| Bi | 6.1             | 6.01               | 6.12        | 6.11        | 1.00    |
| Cd | 1500            | 1493               | 1497        | 1503        | 0.34    |
| Co | 491             | 487                | 481         | 489         | 0.86    |
| Cu | 1000            | 1015               | 1087        | 1032        | 3.60    |
| Fe | 21400           | 21378              | 21556       | 21474       | 0.41    |
| Ga | 251             | 259                | 254         | 253         | 1.26    |
| Ge | 6               | 6.19               | 6.24        | 5.87        | 3.29    |
| In | 21              | 20.76              | 21.03       | 20.97       | 0.68    |

**Supplementary Table 3** S isotopes of quality control material analyzed by IRMS

|      | IAEA-S-1 (‰) | IAEA-S-2 (‰) | IAEA-S-3 (‰) |
|------|--------------|--------------|--------------|
| 1    | -0.13        | +22.47       | -32.41       |
| 2    | -0.42        | +22.72       | -32.35       |
| 3    | -0.42        | +22.60       | -32.67       |
| 4    | -0.19        | +22.90       | -32.54       |
| STDV | 0.15         | 0.18         | 0.14         |
| Mean | -0.29        | +22.67       | -32.49       |

**Supplementary Table 4** Concentrations of different elements in quality control material analyzed by LA-ICP-MS ( $\mu\text{g g}^{-1}$ )

|    | SKLODG             |                 |                    |                    |                 |                    | USTC               |                 |                    | SKLCD              |                 |                    |
|----|--------------------|-----------------|--------------------|--------------------|-----------------|--------------------|--------------------|-----------------|--------------------|--------------------|-----------------|--------------------|
|    | GSE-1G (n=12)      |                 |                    | MASS-1 (n=10)      |                 |                    | GSE-1G (n=3)       |                 |                    | GSE-1G (n=4)       |                 |                    |
|    | Calibration values | Preferred value | Relative deviation | Calibration values | Preferred value | Relative deviation | Calibration values | Preferred value | Relative deviation | Calibration values | Preferred value | Relative deviation |
| Na | 30603.61           | 28935.48        | 5.77               | 26358.00           | 24483.87        | 7.65               | 29779.06           | 28935.48        | 2.92               | 30583.54           | 28935.48        | 5.70               |
| Mg | 20161.19           | 21000.00        | -3.99              | 34.09              | -               | -                  | 19387.68           | 21000.00        | -7.68              | 22570.58           | 21000.00        | 7.48               |
| S  | -                  | -               | -                  | 286710.20          | 276000.00       | 3.88               | -                  | -               | -                  | 3114.18            | -               | -                  |
| Ca | 49459.46           | 53586.21        | -7.70              | <DL                | -               | -                  | 57380.74           | 53586.21        | 7.08               | 56936.14           | 53586.21        | 6.25               |
| Sc | 491.26             | 530.00          | -7.31              | <DL                | -               | -                  | 503.43             | 530.00          | -5.01              | 550.12             | 530.00          | 3.80               |
| V  | 430.34             | 440.00          | -2.20              | 63.55              | 63.00           | 0.87               | 424.29             | 440.00          | -3.57              | 470.81             | 440.00          | 7.00               |
| Cr | 371.24             | 400.00          | -7.19              | 65.09              | 65.00           | 0.14               | 387.08             | 400.00          | -3.23              | 424.06             | 400.00          | 6.02               |
| Mn | 571.57             | 590.00          | -3.12              | 266.51             | 280.00          | -4.82              | 577.23             | 590.00          | -2.17              | 624.67             | 590.00          | 5.88               |
| Fe | 101017.62          | 98700.00        | 2.35               | 164257.00          | 156000.00       | 5.29               | 99527.60           | 98700.00        | 0.84               | 103930.56          | 98700.00        | 5.30               |
| Co | 407.47             | 380.00          | 7.23               | 64.99              | 60.00           | 8.32               | 398.04             | 380.00          | 4.75               | 397.37             | 380.00          | 4.57               |
| Ni | 485.07             | 440.00          | 10.24              | 102.89             | 97.00           | 6.07               | 458.99             | 440.00          | 4.32               | 472.40             | 440.00          | 7.36               |
| Cu | 352.13             | 380.00          | -7.33              | 137841.10          | 134000.00       | 2.87               | 390.93             | 380.00          | 2.88               | 388.10             | 380.00          | 2.13               |
| Zn | 496.00             | 460.00          | 7.83               | 204622.10          | 210000.00       | -2.56              | 422.00             | 460.00          | -8.26              | 479.00             | 460.00          | 4.13               |
| Ga | 534.44             | 490.00          | 9.07               | 57.81              | 64.00           | -9.67              | 470.99             | 490.00          | -3.88              | 437.73             | 490.00          | -10.67             |
| Ge | 335.50             | 320.00          | 4.84               | 51.37              | -               | -                  | 298.33             | 320.00          | -6.77              | 327.14             | 320.00          | 2.23               |
| As | 247.43             | 260.00          | -4.83              | 67.07              | 65.00           | 3.18               | 237.82             | 260.00          | -8.53              | 260.07             | 260.00          | 0.03               |
| Se | 23.51              | 20.00           | 17.54              | 58.09              | 51.00           | 13.90              | 18.82              | 20.00           | -5.90              | -                  | 20.00           | -                  |
| Zr | 383.42             | 410.00          | -6.48              | 0.18               | -               | -                  | 418.66             | 410.00          | 2.11               | 402.82             | 410.00          | -1.75              |
| Ag | 219.71             | 200.00          | 9.85               | 54.49              | 50.00           | 8.99               | 184.46             | 200.00          | -7.77              | 202.77             | 200.00          | 1.39               |
| Cd | 174.31             | 160.00          | 8.94               | 60.83              | 60.00           | 1.38               | 145.33             | 160.00          | -9.17              | 172.83             | 160.00          | 8.02               |
| In | 390.48             | 370.00          | 5.53               | 53.77              | 50.00           | 7.53               | 365.70             | 370.00          | -1.16              | 400.85             | 370.00          | 8.34               |
| Te | 230.73             | -               | -                  | 16.94              | 15.00           | 12.96              | 249.56             | -               | -                  | -                  | -               | -                  |
| Ba | 391.43             | 427.00          | -8.33              | 11.88              | 14.00           | -15.13             | 395.11             | 427.00          | -7.47              | 451.04             | 427.00          | 5.63               |
| Pb | 396.87             | 378.00          | 4.99               | 71.63              | 68.00           | 5.33               | 409.26             | 378.00          | 8.27               | 387.82             | 378.00          | 2.60               |
| Bi | 343.22             | 320.00          | 7.26               | 58.82              | 60.00           | -1.97              | 324.75             | 320.00          | 1.48               | 320.02             | 320.00          | 0.01               |

**Supplementary Table 5.** Instrument parameters and data calibration for measurements of S isotopes and trace elements by LA-(MC)-ICP-MS.

| LA-ICP-MS                     | SKLODG                   | USTC                          | SKLCD                      |                         |
|-------------------------------|--------------------------|-------------------------------|----------------------------|-------------------------|
| ICP-MS                        | Agilent 7700x            | Agilent 7700e                 | Agilent 7700x              |                         |
| Forward power                 | 1400 W                   | 1350 W                        | 1400 W                     |                         |
| Carrier gas (Ar)              | 0.9 L min <sup>-1</sup>  | 0.7 L min <sup>-1</sup>       | 1.0 L min <sup>-1</sup>    |                         |
| Oxide rate (Tho/Th)           | <0.3%                    | <0.5%                         | <0.3%                      |                         |
| Doubly charged formation rate | <0.3%                    | <0.3%                         | <0.3%                      |                         |
| Plasma condition (U/Th)       | 0.95-1.05                | 0.95-1.05                     | 0.95-1.05                  |                         |
| Laser ablation                | Resolution-LR-S155       | GeoLas pro, Coherent          | GeoLas 2005, Lambda Physik |                         |
| Wavelength                    | 193nm                    | 193 nm                        | 193 nm                     |                         |
| Energy density on sample      | 2 J cm <sup>-2</sup>     | 3.0 J cm <sup>-2</sup>        | 2.5 J cm <sup>-2</sup>     |                         |
| Pulse frequency               | 5 Hz                     | 6 Hz                          | 5 Hz                       |                         |
| Spot size                     | 26 μm, 40μm              | 40 μm                         | 37 μm                      |                         |
| Carrier gas (He)              | 350 ml min <sup>-1</sup> | 900 ml min <sup>-1</sup>      | 370 ml min <sup>-1</sup>   |                         |
| Standard                      | STDGL3, GSD-1G           | STDGL3, GSD-1G                | MASS-1, GSD-1G, BCR-2G     |                         |
| Software                      | LADR                     | Iolite 4.0                    | ICPMSDataCal 10.0          |                         |
| Calibration                   | Normalization            | Normalization                 | Normalization              |                         |
| LA-MC-ICP-MS                  | SKLODG                   | Nanjing FoucuMS               | SKLCD                      | CAGS                    |
| MC-ICP-MS                     | Nu plasma III            | Nu plasma II                  | Nu 1700                    | Finnigan Neptune        |
| Forward power                 | 1400 W                   | 1300 W                        | 1300 W                     | 1300 W                  |
| Carrier gas (Ar)              | 0.85L min <sup>-1</sup>  | 0.9 L min <sup>-1</sup>       | 0.8 L min <sup>-1</sup>    | 0.9 L min <sup>-1</sup> |
| Integration time              | 0.4 s                    | 0.3 s                         | 0.4 s                      | 0.3 s                   |
| Mass resolution               | Medium resolution        | Medium resolution             | Medium resolution          | Medium resolution       |
| Laser ablation                | Resolution-LR-S155       | Teledyne Cetac Analyte Excite | CompexPro 102              | Resolution-LR-S155      |
| Wavelength                    | 193 nm                   | 193 nm                        | 193 nm                     | 193 nm                  |
| Energy density on sample      | 2 J cm <sup>-2</sup>     | 2.5 J cm <sup>-2</sup>        | 4 J cm <sup>-2</sup>       | 5 J cm <sup>-2</sup>    |
| Pulse frequency               | 5 Hz                     | 5 Hz                          | 3 Hz                       | 4 Hz                    |
| Spot size                     | 60 μm                    | 35 μm                         | 37 μm                      | 32 μm                   |
| Carrier gas (He)              | 200 ml min <sup>-1</sup> | 800 ml min <sup>-1</sup>      | 300 ml min <sup>-1</sup>   | 200ml min <sup>-1</sup> |
| Standard                      | NBS123,<br>PAS-GBW07270  | NBS123,<br>NWU-Zn             | NBS123,<br>PAS-SPH         | NBS123                  |
| Mass bias                     | SSB                      | SSB                           | SSB                        | SSB                     |
